# Supplementary material for: Hemocompatibility of β-Cyclodextrin-Modified (Methacryloyloxy)ethyl Phosphorylcholine Coated Magnetic Nanoparticles
Source: MDPI journal article supplement (doi:10.3390/biom13081165), 2023-07-25
Supplement: s1 [file s1]

# Support information for Hemocompatibility of $\beta$ -Cyclodextrin-Modified (Methacryloyloxy)ethyl Phosphorylcholine Coated Magnetic Nanoparticles

Shuhui Li <sup>1,†</sup>, Mehdi Ghaffari Sharaf <sup>1,†</sup>, Elyn M. Rowe <sup>2</sup>, Katherine Serrano <sup>2</sup>, Dana V. Devine <sup>2</sup>  
and Larry D. Unsworth <sup>1,\*</sup>

<sup>1</sup> Department of Chemical and Materials Engineering, University of Alberta,  
Edmonton, AB T6G 1H9, Canada; shuhui1@ualberta.ca (S.L.); mghaffar@ualberta.ca (M.G.S.)

<sup>2</sup> Department of Pathology and Laboratory Medicine, University of British Columbia,  
Vancouver, BC V6T 1Z7, Canada; elyn.rowe@ubc.ca (E.M.R.); katherine.serrano@blood.ca (K.S.);  
ddevine@pathology.ubc.ca (D.V.D.)

\* Correspondence: lunsworth@ualberta.ca

† These authors contributed equally to this work.

**Keywords:** polymer coated magnetic nanoparticles; cyclodextrin; protein adsorption

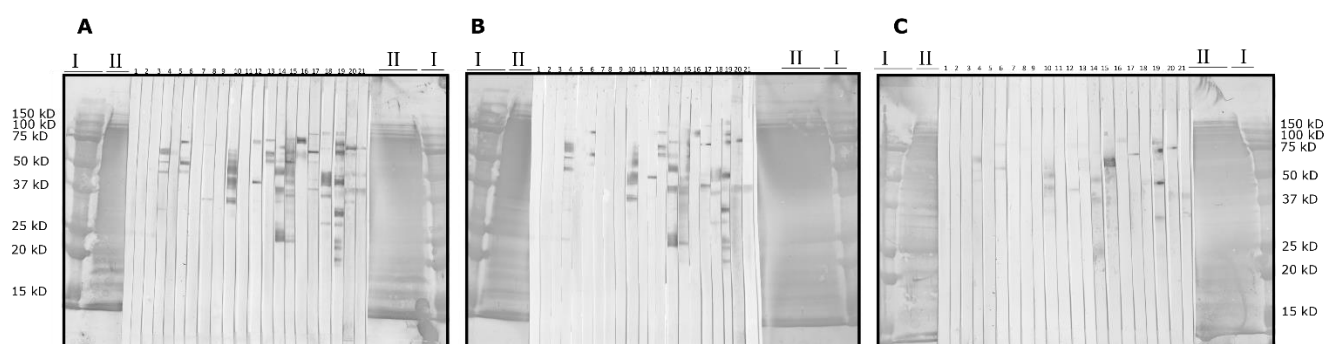

**Figure S1.** Representative reassembled western blot membrane of eluted plasma proteins (A) bare MNPs, (B) Particle A, (C): Particle E). The middle strips (1-21) are processed in western blots, and two side pieces are non-specifically stained with colloidal gold stain. .

- |    |                                                         |
|----|---------------------------------------------------------|
| I  | Ladder                                                  |
| II | Protein sample stained with non-specific colloidal gold |
| 1  | Ani-kininogen (light)                                   |
| 2  | Ani-kininogen (heavy)                                   |
| 3  | Anti-factor I                                           |
| 4  | Anti-fibrinogen $\alpha$ , $\beta$ , and $\gamma$       |
| 5  | Anti-fibronectin                                        |
| 6  | Anti-Alpha <sub>1</sub> antitrypsin                     |
| 7  | Anti-thrombin                                           |
| 8  | Anti-prothrombin                                        |
| 9  | Anti-protein C                                          |

|    |                                       |
|----|---------------------------------------|
| 10 | Anti-vitronectin                      |
| 11 | Anti-protein S                        |
| 12 | Anti-Prekallikrein                    |
| 13 | Anti-antithrombin                     |
| 14 | Anti-IgG                              |
| 15 | Anti-human albumin                    |
| 16 | Anti-plasminogen                      |
| 17 | Anti-C3                               |
| 18 | Anti-factor XII                       |
| 19 | Anti-factor XI                        |
| 20 | Anti-transferrin                      |
| 21 | Anti-alpha <sub>2</sub> macroglobulin |

**Table S1.** Primary antibodies against human plasma proteins used in immunoblot studies.

| Anti-Human Plasma Antibody | Host   | Vendor                                          |
|----------------------------|--------|-------------------------------------------------|
| Albumin                    | Goat   | OEM Concepts, Saco, ME, USA                     |
| Antithrombin               | Sheep  | Cedarlane Laboratories, Hornby, Ontario, Canada |
| Complement factor 3        | Goat   | Calbiochem, Gibbstown, NJ, USA                  |
| Factor I                   | Mouse  | Invitrogen; Thermo Fisher Scientific Inc.       |
| Factor XI                  | Goat   | Cedarlane Laboratories, Hornby, Ontario, Canada |
| Factor XII                 | Goat   | Cedarlane Laboratories, Hornby, Ontario, Canada |
| Fibrinogen                 | Rabbit | Calbiochem, Gibbstown, NJ, USA                  |
| Fibronectin                | Rabbit | Cedarlane Laboratories, Hornby, Ontario, Canada |
| IgG                        | Goat   | Sigma-Aldrich, St. Louis, MO, USA               |
| Kininogen (heavy chain)    | Mouse  | US Biological, Swampscott, MA, USA              |
| Kininogen (light chain)    | Mouse  | US Biological, Swampscott, MA, USA              |
| Plasminogen                | Goat   | Cedarlane Laboratories, Hornby, Ontario, Canada |
| Prekallikrein              | Sheep  | Cedarlane Laboratories, Hornby, Ontario, Canada |
| Protein C                  | Sheep  | Cedarlane Laboratories, Hornby, Ontario, Canada |
| Protein S                  | Sheep  | Cedarlane Laboratories, Hornby, Ontario, Canada |
| Prothrombin                | Sheep  | Cedarlane Laboratories, Hornby, Ontario, Canada |
| Thrombin                   | Sheep  | Cedarlane Laboratories, Hornby, Ontario, Canada |
| Transferrin                | Goat   | Sigma-Aldrich, St. Louis, MO, USA               |
| Vitronectin                | Sheep  | Cedarlane Laboratories, Hornby, Ontario, Canada |
| $\alpha$ 1-Antitrypsin     | Sheep  | Cedarlane Laboratories, Hornby, Ontario, Canada |
| $\alpha$ 2-Macroglobulin   | Goat   | Sigma-Aldrich, St. Louis, MO, USA               |

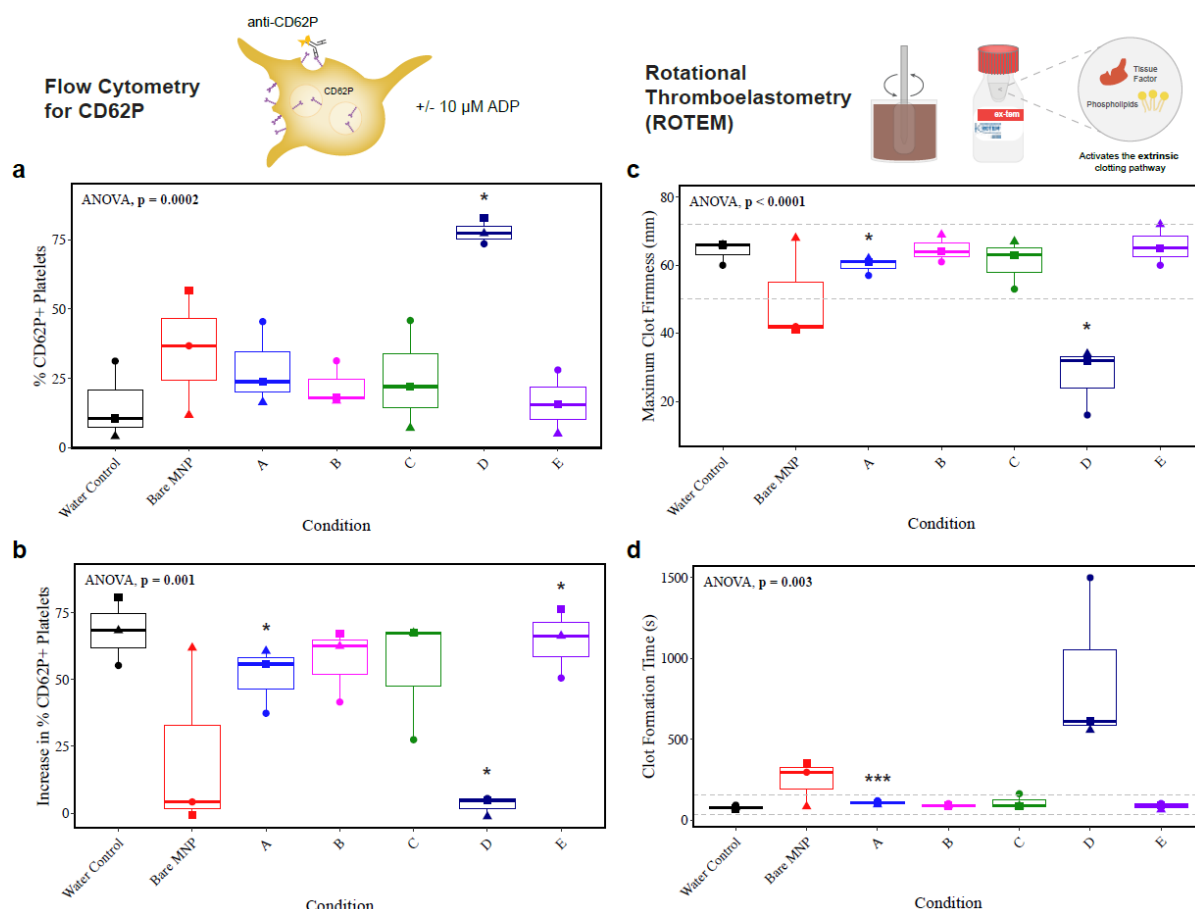

**Figure S2. Increased platelet activation and deficit in platelet function with increased concentration of MNP-D.** Whole blood from  $n=3$  healthy donors was incubated with  $0.5\text{mg/mL}$  of each MNP formulation, then assessed for platelet-related outcomes. (a) Baseline platelet activation reflected by surface expression of CD62P detected by flow cytometry. Percentage of CD62P+ platelets displayed. (b) Platelet degranulation in response to  $10\mu\text{M}$  ADP, reflected by surface expression of CD62P detected by flow cytometry. Baseline activation was subtracted from the % CD62P+ platelets to yield the increase in degranulated platelets, as a measure of the platelet response. c) Platelet function in coagulation reflected by ROTEM maximum clot firmness and d) clot formation time. Dashed lines indicate normal ranges as per manufacturer's information, and shapes reflect biological replicates. Results were compared across groups with repeated measures ANOVA to compare differences within biological replicates, across groups, and paired t-tests were used for pairwise comparisons to the water control (\*  $p < 0.05$ , \*\*\*  $p < 0.001$ ). Comparisons not shown were not statistically significant.
